# Supplementary material
Source: publisher figshare collection journal article supplement (https://future-science-group.figshare.com/ndownloader/files/33289730)

*ACT GAPDH*


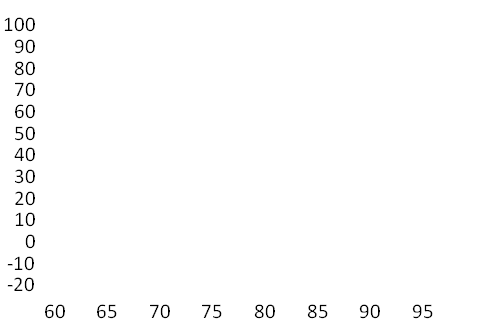

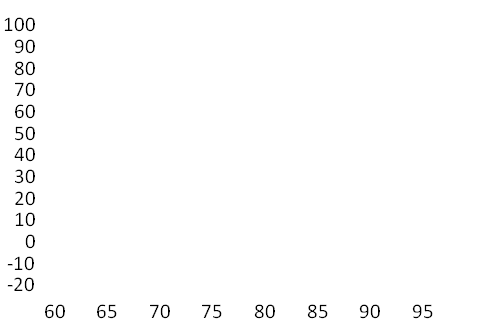

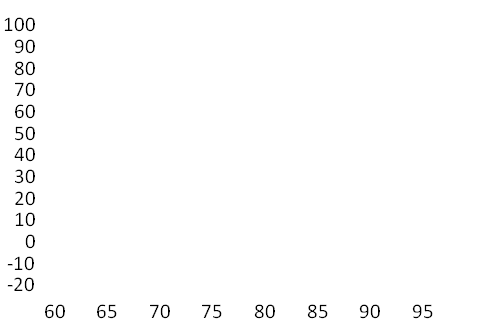

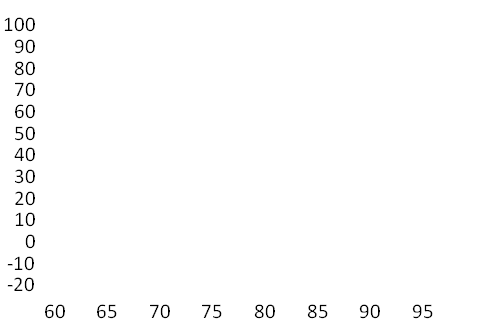

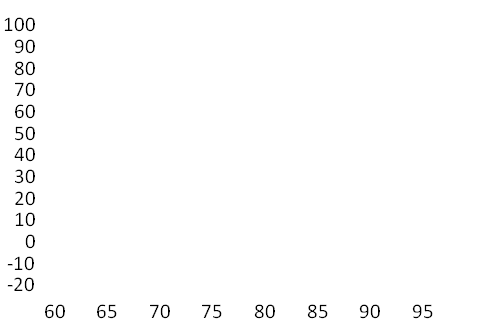

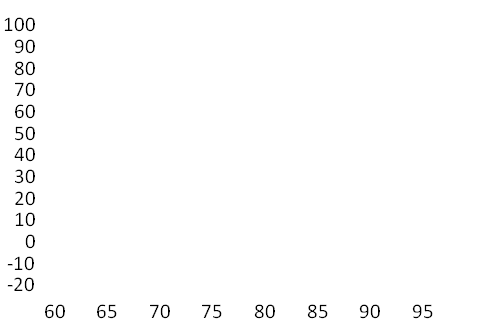


*18S rRNA EF1α*

*UBQ2 UBQ3*

**Figure S1.** Melting curves of the eight candidate RGs.

Supplement: Supplementary file 1 [file 33289730]
